# Supplementary material for: Systematic Inference of Copy-Number Genotypes from Personal Genome Sequencing Data Reveals Extensive Olfactory Receptor Gene Content Diversity
Source: PLoS Comput Biol. 2010 Nov 11;6(11):e1000988. doi: 10.1371/journal.pcbi.1000988 (PMC2978733; doi:10.1371/journal.pcbi.1000988)
Supplement: Table S1 — Individuals analyzed in this study and numbers of filtered sequencing reads considered. All analyzed individuals were recently sequenced in the “pilot 1 project” of the 1000GP at relatively low sequencing coverage. Samples for which high-quality sequencing data were available included one parent-offspring trio of European ancestry, which consisted of father (NA12891), mother (NA12892), and daughter (NA12878). 20 samples were excluded based on the total variance of G+C-adjusted read-depth ratios that we measured in the normalization loci (see Figure S4B). Most excluded samples were sequenced with very low sequence-depth (i.e., <1-fold haploid coverage; see Figure S4B). We applied a variance cutoff of 0.01 for excluding samples. (0.04 MB XLS) [file pcbi.1000988.s021.xls]

## Sheet: Sheet1
Sample	Population	Gender (1=Male;2=Female)	Sequencing Coverage (1000 Genomes Project, Pilot 1)	Number of Filtered Reads (for benchmark CNV Set and OR Loci)
NA06986	CEU	1	4.70554	438469
NA06994	CEU	1	3.5569	414530
NA07037	CEU	2	4.2549	432547
NA07051	CEU	1	5.75457	532992
NA07346	CEU	2	2.6306	221530
NA07357	CEU	1	3.89148	460407
NA10847	CEU	2	4.39572	422302
NA10851	CEU	1	5.90731	707985
NA11830	CEU	2	2.48413	226480
NA11831	CEU	1	3.20031	294720
NA11881	CEU	1	2.53339	296879
NA11894	CEU	2	2.59377	314541
NA11919	CEU	1	3.64502	333903
NA11920	CEU	2	3.21418	290692
NA11931	CEU	2	2.43102	288147
NA11992	CEU	1	4.59889	342827
NA11993	CEU	2	2.47274	290020
NA11994	CEU	1	2.25211	207835
NA11995	CEU	2	2.70232	323313
NA12003	CEU	1	3.46643	322377
NA12004	CEU	2	2.39254	287517
NA12006	CEU	2	1.89602	221519
NA12043	CEU	1	2.06857	247987
NA12044	CEU	2	3.23842	387970
NA12045	CEU	1	1.98259	185943
NA12144	CEU	1	2.93827	341039
NA12155	CEU	1	2.11	189297
NA12156	CEU	2	2.03302	247339
NA12249	CEU	2	3.41454	306550
NA12287	CEU	2	2.41277	282568
NA12414	CEU	2	1.68297	196794
NA12489	CEU	2	2.06918	244844
NA12716	CEU	1	6.67576	683882
NA12717	CEU	2	5.88151	598601
NA12749	CEU	2	2.13652	248210
NA12750	CEU	1	5.08314	523211
NA12751	CEU	2	5.39834	540414
NA12761	CEU	2	6.2162	635301
NA12763	CEU	2	4.71307	479252
NA12776	CEU	2	2.01931	238758
NA12813	CEU	2	2.47984	290149
NA12828	CEU	2	2.08992	245342
NA12878	CEU	2	3.92461	455671
NA12891	CEU	1	4.71108	561284
NA12892	CEU	2	4.29619	518297
NA18489	YRI	2	3.1767	286576
NA18498	YRI	1	2.6144	220391
NA18499	YRI	2	2.76486	252105
NA18501	YRI	1	5.75743	593299
NA18502	YRI	2	5.20023	626223
NA18504	YRI	1	2.97882	245459
NA18505	YRI	2	5.77459	683140
NA18508	YRI	2	4.75692	564119
NA18510	YRI	1	3.18464	291912
NA18511	YRI	2	1.86404	221891
NA18517	YRI	2	3.88697	466584
NA18519	YRI	1	3.0636	280126
NA18520	YRI	2	2.74552	177937
NA18522	YRI	1	5.79328	433062
NA18523	YRI	2	4.97483	588719
NA18526	CHB	2	2.56252	254751
NA18532	CHB	2	2.25033	63835
NA18537	CHB	2	2.66245	275285
NA18542	CHB	2	2.95977	276833
NA18545	CHB	2	2.8673	292898
NA18547	CHB	2	2.59896	265222
NA18550	CHB	2	2.97241	313829
NA18552	CHB	2	2.78191	265151
NA18555	CHB	2	2.82195	270082
NA18558	CHB	1	2.79869	299693
NA18561	CHB	1	2.79157	289493
NA18562	CHB	1	1.71904	222664
NA18563	CHB	1	2.72397	296238
NA18564	CHB	2	2.81175	304372
NA18566	CHB	2	2.69188	271600
NA18570	CHB	2	2.85456	282758
NA18571	CHB	2	2.94938	294447
NA18572	CHB	1	3.17961	306921
NA18573	CHB	2	2.85431	277611
NA18577	CHB	2	3.06272	294551
NA18579	CHB	2	2.2006	221193
NA18582	CHB	2	2.73749	269301
NA18592	CHB	2	3.09479	311670
NA18593	CHB	2	2.87717	288590
NA18603	CHB	1	2.54455	266029
NA18605	CHB	1	2.39263	234324
NA18608	CHB	1	2.8193	288038
NA18609	CHB	1	2.8145	297973
NA18638	CHB	1	2.87068	282850
NA18853	YRI	1	3.25941	267765
NA18856	YRI	1	2.67674	249463
NA18858	YRI	2	5.06377	606135
NA18861	YRI	2	5.10178	615168
NA18870	YRI	2	4.45445	445247
NA18871	YRI	1	3.60037	290954
NA18907	YRI	2	4.91575	588032
NA18909	YRI	2	2.83998	332157
NA18912	YRI	2	3.3832	272565
NA18916	YRI	2	3.80221	453170
NA18940	JPT	1	2.45662	295292
NA18942	JPT	2	2.49729	295187
NA18943	JPT	1	2.71213	329623
NA18944	JPT	1	2.42806	288736
NA18945	JPT	1	2.55539	308042
NA18947	JPT	2	2.70734	326063
NA18948	JPT	1	2.98717	361192
NA18949	JPT	2	3.15682	377562
NA18951	JPT	2	2.88639	341099
NA18952	JPT	1	2.83084	337118
NA18956	JPT	2	3.05598	361600
NA18961	JPT	1	4.17402	309119
NA18964	JPT	2	4.11215	373529
NA18965	JPT	1	2.71032	326257
NA18967	JPT	1	2.94536	353649
NA18968	JPT	2	2.65917	327461
NA18971	JPT	1	3.4097	422132
NA18972	JPT	2	2.75824	340874
NA18973	JPT	2	2.54291	301406
NA18974	JPT	1	2.67626	338833
NA18975	JPT	2	3.03152	368059
NA18976	JPT	2	3.66878	442860
NA18981	JPT	2	3.64808	447579
NA19005	JPT	1	2.25578	271053
NA19093	YRI	2	5.05896	568222
NA19098	YRI	1	2.19143	268041
NA19099	YRI	2	4.75014	563806
NA19102	YRI	2	3.95606	361482
NA19108	YRI	2	7.01063	828402
NA19114	YRI	2	4.66531	550546
NA19119	YRI	1	2.12899	256683
NA19129	YRI	2	3.14562	370636
NA19137	YRI	2	3.97465	476222
NA19138	YRI	1	6.5716	794048
NA19147	YRI	2	4.4751	548917
NA19152	YRI	2	3.65955	447520
NA19153	YRI	1	2.31894	286337
NA19159	YRI	2	2.64271	322564
NA19160	YRI	1	3.19221	397423
NA19171	YRI	1	1.25162	155925
NA19172	YRI	2	3.26912	212260
NA19190	YRI	2	2.26166	276195
NA19200	YRI	1	3.18658	386841
NA19201	YRI	2	2.67807	321223
NA19204	YRI	2	2.89757	354803
NA19207	YRI	1	2.73509	337422
NA19209	YRI	2	3.07234	380699
NA19225	YRI	2	3.19282	383721
NA19238	YRI	2	3.75333	455445
NA19240	YRI	2	3.91978	462362
NA19257	YRI	2	4.19557	515202
