# Supplementary material for: Systematic Inference of Copy-Number Genotypes from Personal Genome Sequencing Data Reveals Extensive Olfactory Receptor Gene Content Diversity
Source: PLoS Comput Biol. 2010 Nov 11;6(11):e1000988. doi: 10.1371/journal.pcbi.1000988 (PMC2978733; doi:10.1371/journal.pcbi.1000988)
Supplement: Table S14 — Summary of additional qPCR experiments in 4 OR loci with discordant copy-number genotypes. (0.03 MB XLS) [file pcbi.1000988.s034.xls]

## Sheet: Table
OR Locus	Chr	Start ORF	End ORF	Primer	Forward Primer Sequence	Reverse Primer Sequence	Samples (tested)	CNG*	CNG**	CNG***	Ct Exp1 (Primer1)	Ct Exp2 (Primer1)	Ct Exp3 (Primer1)	Ct Exp1 (Primer2)	Ct Exp2 (Primer2)	Average ΔCt	StdDev ΔCt
OR4A45P	chr11	48557564	48558479	1	GGGGAACCTACTCATTGTCAT	GGAAGTCGACAATCAATACAGG	NA11881	N/A	2	0	40	40	-	38.1584	38.129	13.2528	0.846854
				2	TGATTGTCGACTTCCTCTGTG	GATCTGCACCACCAAACAAG	NA11920	N/A	2	0	40	40	-	38.9037	37.0703	13.1744	0.99191
							NA11994	N/A	3	1	28.44	26.43	-	25.0411	24.7313	0.342528	0.267918
							NA11995	N/A	2	0	40	40	-	38.004	36.7477	12.8688	0.929807
							NA12003	N/A	3	1	28.18	26.23	-	24.933	24.6108	0.168753	0.201196
							NA12045	N/A	3	2	27.87	25.87	-	24.9993	24.5399	0	0
							NA12155	N/A	3	1	28.15	26.02	-	24.7903	24.661	0.084048	0.207018
							NA12716	N/A	2	0	40	40	-	38.3549	37.7359	13.2036	0.82336
OR11K1P	chr15	19820218	19821146	1	GGCATCCGTATTATAGCCAGA	CCCATTGAAGATGCTGTCCT	NA11881	3	2	2	24.1	24.11	24.92	-	-	-0.794718	0.0736228
							NA11920	N/A	2	5	23.5	23.45	23.97	-	-	-1.44137	0.0921097
							NA11994	4	2	4	24.1	24.04	24.58	-	-	-0.852894	0.082772
							NA11995	4	2	4	23.9	23.91	24.54	-	-	-1.00653	0.0505624
							NA12003	2	N/A	2	24.9	24.96	25.52	-	-	0	0
							NA12045	N/A	2	3	24.3	24.27	24.93	-	-	-0.629572	0.0773964
							NA12155	3	2	2	24.2	24.25	24.91	-	-	-0.687895	0.025895
							NA12716	N/A	2	5	23.6	23.67	24.29	-	-	-1.29212	0.00977166
OR5H5P	chr3	99398745	99399669	1	TGACAGAGTTTGTTCTCACATTA	ATCAGACCAAGATTCCCAAAG	NA11881	0	N/A	2	26.97	26.9	25.6157	27.3184	25.2606	0.161532	0.245295
				2	CTAACACAACTCTATCACCCAAG	CTTTTTTGCAGTAAGTGGACTG	NA11920	N/A	N/A	2	26.78	27.2	25.5362	27.1195	25.2801	0.137462	0.172584
							NA11994	0	N/A	2	26.86	27.1	25.3341	27.1006	25.3421	0.0867107	0.172707
							NA11995	1	N/A	2	26.44	26.6	25.4394	27.016	25.4436	-0.0698963	0.163555
							NA12003	1	N/A	2	26.48	26.7	25.3462	26.9234	25.3293	-0.105262	0.0970424
							NA12045	N/A	N/A	2	26.5	26.7	25.5117	26.9252	25.2124	-0.0919183	0.153971
							NA12155	0	N/A	2	26.51	26.7	25.3059	27.027	25.3472	-0.0834641	0.109153
							NA12716	2	N/A	2	26.5	26.9	25.3919	27.0336	25.4051	0	0
OR4N4	chr15	19883837	19884784	1	GCAGCTTCTGAAGGGAAGAAC	GAAAGGGCACATGTAGATGAAG	NA11881	3	N/A	2	25.91	26	25.735	-	-	0	0
							NA11920	N/A	N/A	3	25.15	25.1	24.7804	-	-	-0.801234	0.0468147
							NA11994	4	N/A	3	25.5	25.7	25.1407	-	-	-0.342504	0.106174
							NA11995	4	N/A	2	25.91	26.2	25.7828	-	-	0.088665	0.131139
							NA12003	2	N/A	1	32.26	32.5	32.2347	-	-	6.44508	0.142614
							NA12045	N/A	N/A	2	25.88	26.1	25.7591	-	-	0.0240717	0.0775435
							NA12155	3	N/A	2	25.36	25.5	25.0367	-	-	-0.52969	0.0316297
							NA12716	N/A	N/A	3	25.03	25.2	24.6026	-	-	-0.847955	0.0534044
All coordiantes based on human reference genome (hg18; Build 36.1)
* predicted by McCarroll et al. (2008)
** predicted by Conrad et al. (2009)
*** predicted by CopySeq
